# Supplementary material for: Probing the molecular structure of antimicrobial peptide-mediated silica condensation using X-ray photoelectron spectroscopy
Source: Royal Society of Chemistry journal article supplement (doi:10.1039/c2jm30837a), 2012-01-01
Supplement: c2jm30837a.pdf [file c2jm30837a.pdf]

# **Probing the molecular structure of antimicrobial peptide-mediated silica condensation using X-ray photoelectron spectroscopy**

**D. Matthew Eby, Kateryna Artyushkova, Anant K. Paravastu, and Glenn R. Johnson**

| ELECTRONIC SUPPLEMENTARY INFORMATION TABLE OF CONTENTS | PAGE |
|--------------------------------------------------------|------|
| Total elemental XPS survey of KSL and KSL-Si           | S-2  |
| AFM images of KSL-Si nanoparticles                     | S-3  |

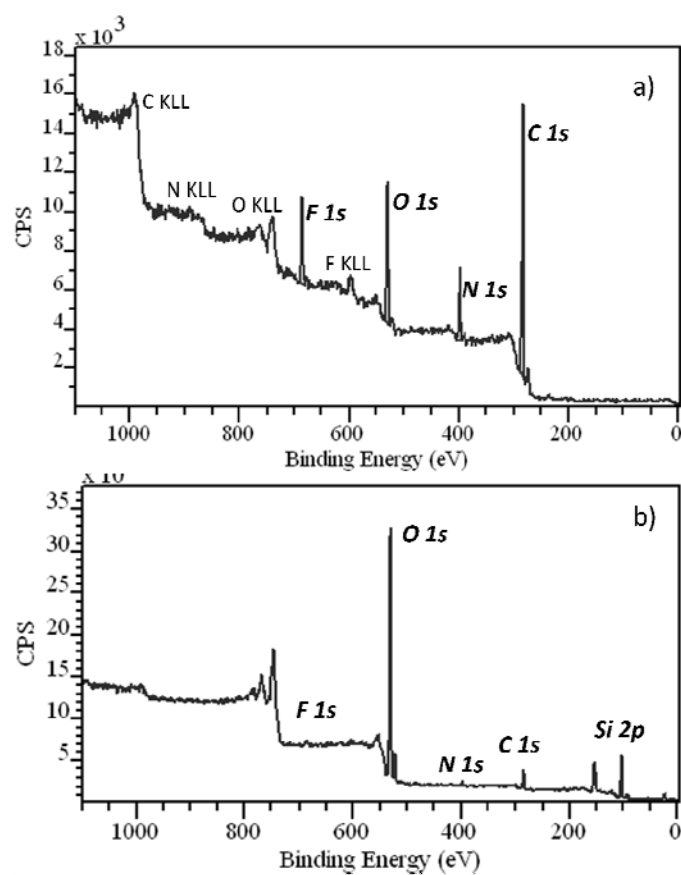

**Figure S1.** Typical XPS survey of KSL (a) and KSL-Si (b). Intensity (y-axis) units are counts per second (CPS)  $\times 10^3$ .

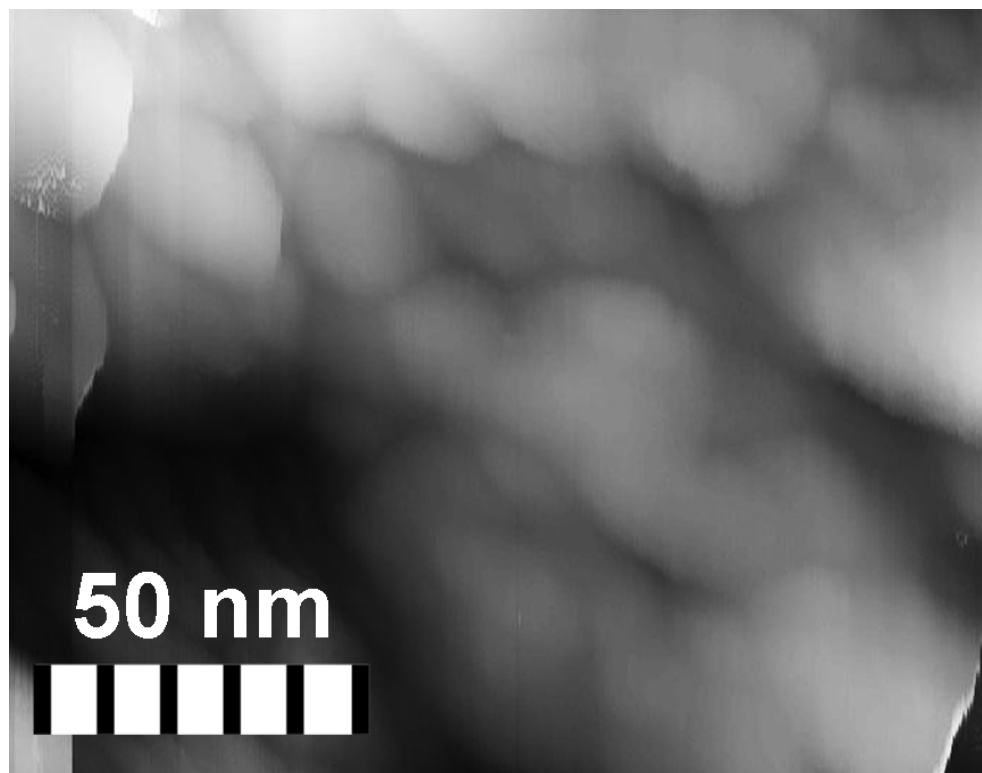

5

**Figure S2.** Atomic force microscope (AFM) image of KSL-Si nanoparticles. AFM images were obtained using a Nanoscope V, equipped with a Multimode V scanning probe microscope and a PicoForce stage (Veeco Instruments Inc, Woodbury, NY). A few microliters of KSL-Si suspension in 10 water was spread onto 5 mm square silicon wafers and dried at 37°C for 5 min before imaging in tapping mode, using an etched phosphorous (n)-doped silicon cantilever probe (type RTESP, Veeco).

15

20
